# Supplementary material
Source: PubMed Central journal article supplement (PMC2853731)

**A**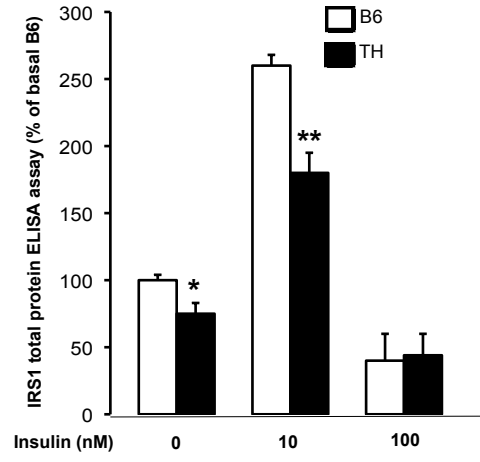**B**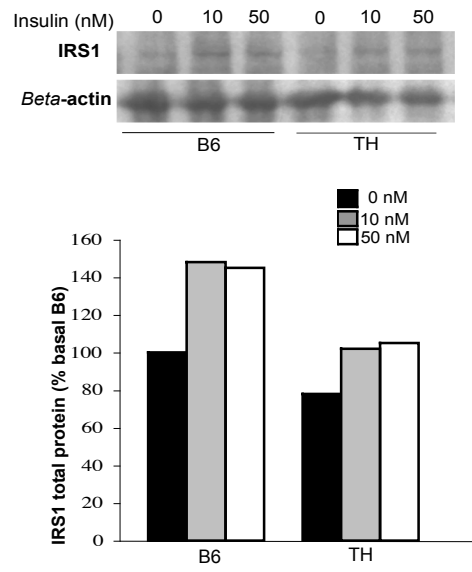**C**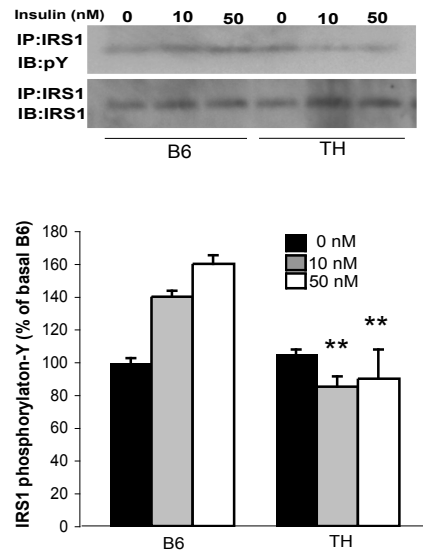

Supplement: NIHMS189221-supplement-Sup_Figure.pdf [file NIHMS189221-supplement-Sup_Figure.pdf]
